# Supplementary material for: Comparison of Lactate Clearance with Established Risk Assessment Tools in Predicting Outcomes in Acute Upper Gastrointestinal Bleeding
Source: MDPI journal article supplement (doi:10.3390/jcm12072716), 2023-04-05
Supplement: s1 [file s1]

**Table S1.** Subgroup analysis on the analyzed endpoints in patients with bleeding from malignancies (n=12) and the non-malignant bleeding group (percentages in columns).

|                         | Bleeding malignancy | Non-malignant bleeding group | p-value |
|-------------------------|---------------------|------------------------------|---------|
| Hemostatic intervention | 8 (66.7)            | 27 (28.4)                    | 0.008   |
| Mortality               | 2 (16.7)            | 10 (10.5)                    | 0.525   |
| Rebleeding              | 2 (16.7)            | 14 (14.7)                    | 0.860   |

**Table S2.** Subgroup analysis on the risk scores' performance in patients with bleeding from malignancies (n=12) and the non-malignant bleeding group.

|                         | Bleeding malignancy | Non-malignant bleeding group | p-value |
|-------------------------|---------------------|------------------------------|---------|
| Hemostatic intervention |                     |                              |         |
| Lactate clearance       | 0.688               | 0.542                        | 0.432   |
| Initial lactate         | 0.406               | 0.593                        | 0.300   |
| pRS                     | 0.500               | 0.572                        | 0.717   |
| GBS                     | 0.734               | 0.653                        | 0.671   |
| Mortality               |                     |                              |         |
| Lactate clearance       | 0.850               | 0.458                        | 0.012   |
| Initial lactate         | 0.550               | 0.641                        | 0.657   |
| pRS                     | 0.525               | 0.645                        | 0.616   |
| fRS                     | 0.625               | 0.689                        | 0.356   |
| GBS                     | 0.525               | 0.602                        | 0.283   |
| Rebleeding              |                     |                              |         |
| Lactate clearance       | 0.450               | 0.553                        | 0.658   |
| Initial lactate         | 0.500               | 0.675                        | 0.316   |
| pRS                     | 0.525               | 0.583                        | 0.744   |
| fRS                     | 0.425               | 0.628                        | 0.353   |
| GBS                     | 0.525               | 0.616                        | 0.732   |

fRS, full Rockall score; GBS, Glasgow-Blatchford score; p-RS, pre-endoscopic RS.

**Table S3.** Comparison of risk scores' performance after including lactate clearance with different weighting.

|     | Points             | AUROC        | p-value |
|-----|--------------------|--------------|---------|
| GBS | LC Cut-off >23.8%* |              |         |
|     | 1                  | 0.658vs0.673 | 0.127   |
|     | 2                  | 0.658vs0.685 | 0.149   |
|     | 3                  | 0.658vs0.692 | 0.190   |
|     | 4                  | 0.658vs0.699 | 0.215   |
|     | 5                  | 0.658vs0.703 | 0.245   |
|     | 6                  | 0.658vs0.704 | 0.285   |
| pRS | 1                  | 0.582vs0.576 | 0.821   |
|     | 2                  | 0.582vs0.568 | 0.782   |
|     | 3                  | 0.582vs0.557 | 0.709   |

AUROC: Area under the receiver operating characteristic; GBS= Glasgow-Blatchford score; LC= lactate clearance; pRS= pre-endoscopic Rockall score.

\*As identified by Youden-Index.
